# Supplementary material for: Next-Generation Sequencing of Apoptotic DNA Breakpoints Reveals Association with Actively Transcribed Genes and Gene Translocations
Source: PLoS One. 2011 Nov 8;6(11):e26054. doi: 10.1371/journal.pone.0026054 (PMC3210745; doi:10.1371/journal.pone.0026054)
Supplement: Table S1 — Detailed Statistics. (Excel Spreadsheet). (XLS) [file pone.0026054.s008.xls]

## Sheet: Sheet1
Supplementary Table 1. Detailed Statistics of Apoptoseq libraries
Sample	Total Reads	Uniquely mapped	Clusters	Filtered Clusters*	Average Cluster Size (bp)
Actinomycin D-treated HL-60 cells, Biological Replicate 1 (AHH001)	38 million	15 million	7565	7413	799
Actinomycin D-treated HL-60 cells, Biological Replicate 2 (AHH002)	108 million	38 million	255829	255488	522
Actinomycin D-treated HL-60 cells, Biological Replicate 2, Technical Replicate 1 (AHH002A)	55 million	18 million	132813	132580	436
Actinomycin D-treated HL-60 cells, Biological Replicate 2, Technical Replicate 2 (AHH002B)	54 million	20 million	126001	125774	446
*After removing clusters in satellites and Chr Y (this is a female cell line)
