# Supplementary material for: Next-Generation Sequencing of Apoptotic DNA Breakpoints Reveals Association with Actively Transcribed Genes and Gene Translocations
Source: PLoS One. 2011 Nov 8;6(11):e26054. doi: 10.1371/journal.pone.0026054 (PMC3210745; doi:10.1371/journal.pone.0026054)
Supplement: Table S3 — List of primers used. (Excel spreadsheet). (XLS) [file pone.0026054.s010.xls]

## Sheet: Sheet1
	Primers used for Apoptoseq qPCR validations	Name/Nearby gene of interest	Forward	Reverse	Genomic Coordinates	Remarks
1	Negative Control 1 (used for normalization)		AGCACAGGCAATGGTGTTAG	TTGAATGGAGCACTGTGGAG	chr2:118591662-118591859	From Wendt et al., Nature, 2008
2	Experimental 1	CASP3	GCTCTGGGTGCCTCCTAAG	TTTCACAGCCTCTGCCTTTT	chr4:185557990-185558083	Apoptosis-associated gene
3	Experimental 2	BIM	GCCCAGCTGCAATAAGGAG	GCAGATACAGTCAGAATCTCAATCA	chr2:111858418-111858487	Apoptosis-associated gene
4	Experimental 3	BCR	GACATTTCACTCACTTGGCTCA	TCCAAACATGCAGTCCATTG	chr22:23535702-23535856	Translocation-associated gene
5	Experimental 4	MET	CAGGGGTTCTGCTTTCTTTG	GCCACGTCTCTTCAGTTTCC	chr7:116312677-116312786	Translocation-associated gene
6	Experimental 5	FHIT	CTGCATACTGAGGCAGACCA	TGCGATCTGCTTTTCAACAC	chr3:60723797-60723898	Translocation-associated gene (Fragile site)
7	Experimental 6	CREB3L2	GCATATGGATAAAATGTAGCCTGTC	TCCTCAAATATCTTTTGATGAATGG	chr7:137684954-137685023	Translocation-associated gene
8	Experimental 7	MYB	CTCCCACCCACTGGAAGTT	ACTGCAGATTGGTCTGTACCC	chr6:135171129-135171191	Translocation-associated gene
9	Experimental 8	LOC153910	CCCTTGCTACAGTGAAATTGG	AGATCGGGGTTCTCTGGTG	chr6:142975351-142975417
10	Experimental 9	ZSCAN22	GACTCAACACCAGCGCATC	ATCAGGGCTGAGCAGTCG	chr19:58850401-58850487
11	Experimental 10	CPAMD8	AACTGCTCCACACCACACC	TTCAGGGACCCCAGATGTAG	chr19:17033267-17033329
12	Experimental 11	HECW2	TTCGAAATCCCGCTTGTAA	TCCTCTCTTTGTGGTTTGCTG	chr2:197106876-197106952
13	Experimental 12	IFRD1	AACCCCAGCTGACATTCTTG	CCCCAGAACAACACCAGTCT	chr7:112055828-112055911
14	Experimental 13	NBPF20	TCAGCCAGGTGAGAACAAGA	TTGCTACTCTTGCGATCGAG	chr1:144539286-144539366
15	Negative Control 2	NegCont	TTTTGAAACTGAAACTGTAAGTGCTAA	CCCTGCAATTTGGAGTCAGT	chr7:116223855-116223943
